# Supplementary material
Source: PubMed Central journal article supplement (PMC2442524)
Supplement: pp.108.117812_3.pdf [file pp.108.117812_3.pdf]

**Supplemental Figure S3.**

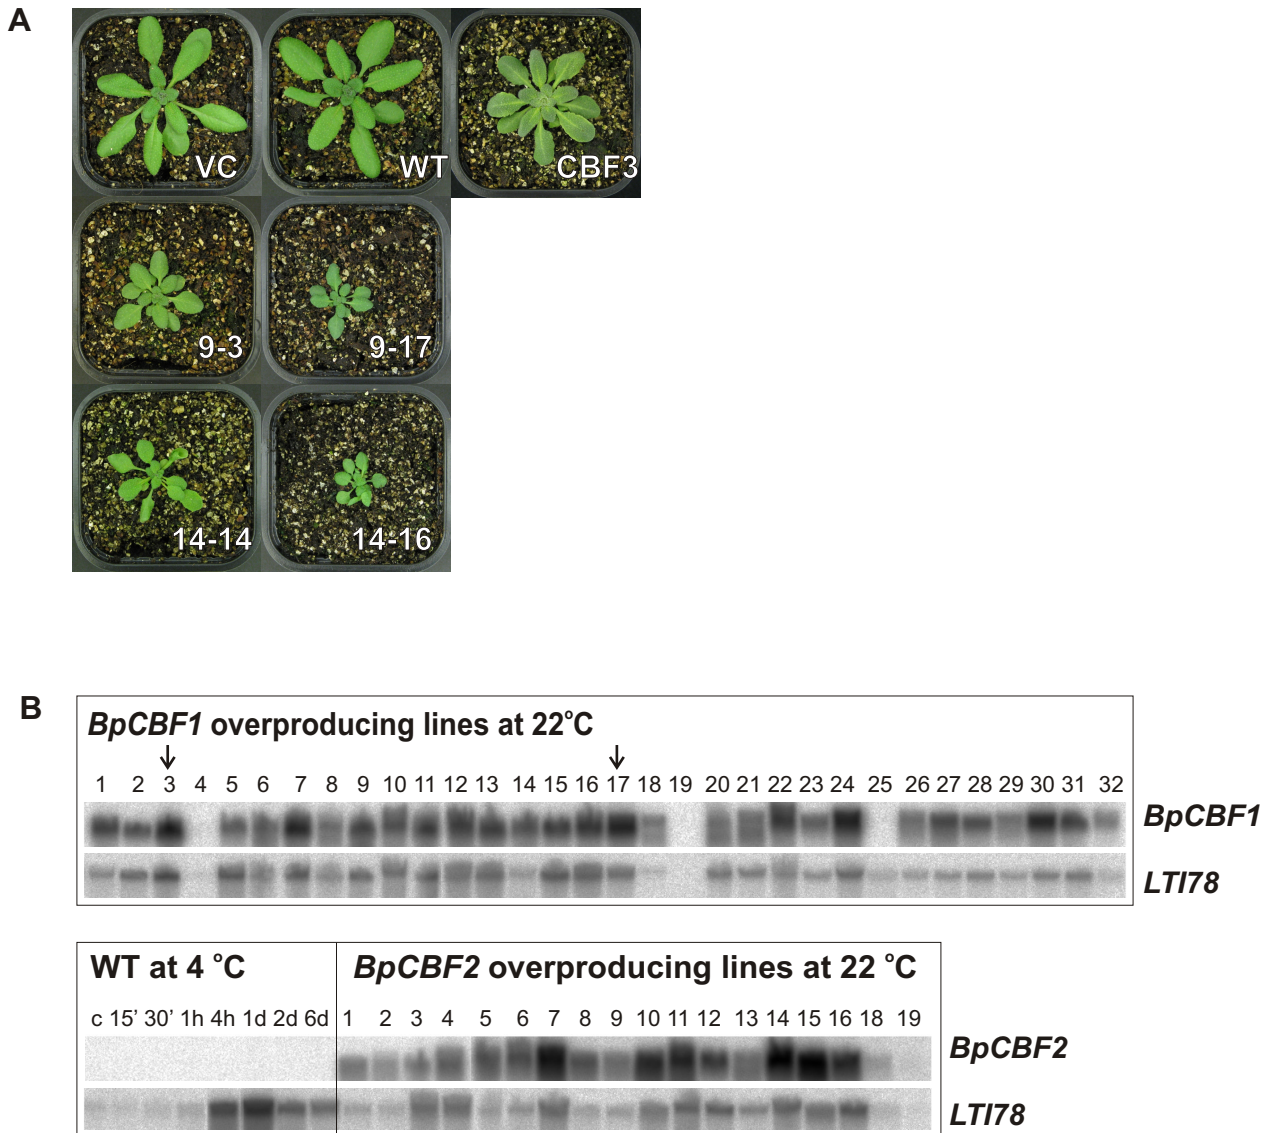

**Supplemental Figure S3.** Characteristics of transgenic Arabidopsis plants overexpressing birch *CBF* genes.

(A) Growth characteristics of three week old wild-type (WT) plants, vector control plant (VC) carrying empty pCP60 vector, *AtCBF3* overexpressing plant (CBF3) and transgenic lines overexpressing birch *BpCBF1* gene (9-3) and (9-17) and *BpCBF2* gene (14-14) and (14-16). (B) Expression analysis of WT and transgenic Arabidopsis lines carrying either birch *BpCBF1* or *BpCBF2* genes under the 35S promoter. Wild-type leaf samples were collected at normal growth temperature 22 °C (c) and after 15 min, 30 min, 1h, 4h, 1d, 2d and 6d of transfer to 4 °C. Transgenic lines were grown at 22 °C for 6 weeks before collecting the leaf samples. The samples were analyzed with RNA gel blot hybridization using <sup>32</sup>P labeled cDNA probes for *BpCBF1*, *BpCBF2* and *LT178*. Arrows indicate the lines (9-3 and 9-17) that were used for further characterization.
